# Supplementary material for: Genetic Health Education in Adolescents with Congenital Heart Disease: A Patient, Parent and Clinician Perspective
Source: Research Square preprint supplement (doi:10.21203/rs.3.rs-7191712/v1), 2025-07-28
Supplement: Supplementary file 1 [file 0d0d60b98b0c0f8cbc3a046d.docx]

Table 1: Participant demographic characteristics

| Demographic variable | | Adolescent participants (n) | Parent/guardian participants (n) |
| --- | --- | --- | --- |
| Gender  Female  Male  Other | | 13 (43%)  17 (57%)  0 | 25 (78%)  7, (22%)  0 |
| Age  13-14  15-16  17-18  30-39  40-49  50-60  Unspecified | | 10  13  7  0  0  0  0 | 0  0  0  4  18  5  5 |
| Ancestry/ethnicity (participants were able to select up to two options)  Caucasian  Aboriginal/Torres Strait Islander  Arabic  South Asian  East Asian  South-East Asian  Pacific Islander  Mixed ethnicity | | 16 (53%)  1 (3%)  5 (17%)  3 (10%)  0 (0%)  2 (7%)  1 (3%)  2 (7%) | 20 (63%)  0 (0%)  4 (13%)  3 (9%)  0 (0%)  2 (6%)  0 (0%)  3 (9%) |
| Geographic  Metro  Rural  Did not respond | | 23 (77%)  6 (20%)  1 (3%) | 22 (69%)  9 (28%)  1 (3%) |
| Household type  Both parents living in the same household  Sole parent family after divorce/ separation  Sole parent family, other parent not involved or deceased  Grandparents are sole carers  Blended family  Foster family  Other | | 23 (76.7%)  5 (16.7%)  0  0  2 (6.7%)  0  0 | 25 (78.1%)  4 (12.5%)  1 (3.1%)  0  1, 3.1%  0  1, 3.1% |
| Education | *Type of school attended:*  **Private school (including catholic**  **and independent schools):** 9 (30%)  **Public school:** 21 (70%)  *Currently in:*  **Year 7:** 3 (10%)  **Year 8:** 4 (13.3%) **Year 9:** 4 (13.3%)  **Year 10:** 6 (20%)  **Year 11:** 3 (10%)  **Year 12:** 7 (23.3%)  **Completed year 12:** 3 (10%)  **Left school prior to year 12:** 0 | | *Highest level of education:*  **Primary school:** 0  **High school:** 8 (25%)  **TAFE or college certificate or diploma:** 9 (28%)  **Trade/apprenticeship:** 0  **University graduate:** 10 (31%)  **Postgraduate study:** 5 (16%)  **Other:** 0 |
| Have you learnt about genetics at school (e.g genes, chromosomes, Mendelian inheritance or punnet squares)? | | Yes: 14 (47%)  No: 16 (53%) |  |
| Oral health rating  Excellent  Very good  Good  Fair  Poor | | 2 (7%)  14 (47%)  10 (33%)  4 (13%)  0 | 5 (16%)  12 (39%)  6 (19%)  7 (23%)  1 (3%) |
| CHD type (broad categories)  ASD  VSD  AVSD and associated variants  Malformation of outflow tract  Obstructive  Functional single ventricle  Heterotaxy  Other | | 2 (7%)  6 (20%)  1 (3%)  10 (33%)  3 (10%)  4 (13%)  0  4 (13%) | 2 (6%)  6 (19%)  3 (9%)  9 (28%)  4 (13%)  5 (16%)  0  3 (9%) |
| CHD lesion correctly identified  Yes  No | | 24 (80%)  6 (20%) | 29 (91%)  3 (9%) |
| Family history of CHD  Yes  No | | 2 (7%)  28 (93%) | 4 (12%)  28 (88%) |
| Genetic diagnosis CHD causative  Yes  No | | 3 (10%)  27 (90%) |  |
| Genetics consult (CHW eMR)  Yes  No  Genetics consult (self reported)  Yes  Yes - not in relation to the heart condition  No  Unsure | | 7 (23%)  23 (77%)  2 (7%)  2 (7%)  17 (57%)  9 (30%) | 6 (19%)  2 (6%)  19 (59%)  5 (16%) |
